# Supplementary material
Source: PubMed Central journal article supplement (PMC4313795)
Supplement: pnas.201423952SI.pdf [file pnas.201423952SI.pdf]

# Supporting Information

Vatner et al. 10.1073/pnas.1423952112

## SI Methods

**Short Hyperinsulinemic-Euglycemic Clamp Studies.** To assess classical hepatic insulin signaling in rats treated with insulin receptor ASO vs. control ASO, insulin infusions were performed to attain a hyperinsulinemic-euglycemic state for 20 min. A primed/continuous infusion of human insulin (40 mU/kg·min for 3 min/[4 mU/kg·min; Novo Nordisk) and a variable infusion of ~20% (wt/vol) dextrose to maintain euglycemia were used. At the end of the clamp, rats were anesthetized with sodium pentobarbital injection (75 mg/kg), and all tissues were taken within 1 min, frozen immediately using cooled aluminum tongs in liquid N<sub>2</sub>, and stored at -80 °C.

**In Vivo de Novo Lipogenesis Studies.** Four groups of rats were studied: regular chow-fed controls were compared with high fat diet-fed rats and control ASO-injected controls were compared with IRASO-injected rats. Three days before death, total body water deuterium enrichment was increased by s.c. injection of a bolus of normal saline made with 99% <sup>2</sup>H-enriched water (Cambridge Isotope Laboratories), at a dose of 23.4 mL/kg. The rats were given 6% (vol/vol) <sup>2</sup>H<sub>2</sub>O-enriched drinking water for the ensuing 3 d. Liver and plasma were taken during euthanasia under isoflurane. Hepatic palmitate isotope enrichment was determined by GC/MS (described below). The plasma <sup>2</sup>H<sub>2</sub>O pool was assessed by synthesis of acetylene from plasma treated with calcium carbide. Deuterium enrichment of acetylene was analyzed by GC/MS.

Calculation of de novo hepatic palmitate synthesis from isotopic data has been previously described (1–3). Fraction hepatic palmitate pool newly synthesized over the 3 d (F) was calculated by the following equation:  $F = ME/(N \times p)$ , where molar enrichment (ME) equals the sum of  $m1 + (2 \times m2)$ , where  $m1$  and  $m2$  are the atom percent enrichments of singly and doubly deuterium labeled palmitate;  $N$  is the number of exchangeable hydrogens, previously reported to be 22; and  $p$  is the plasma atom percentage of enrichment of deuterium in water.

**Biochemical Analysis.** Glucose concentrations were determined using an YSI (2700 select), plasma fatty acids and triglycerides were determined using standard kits (Wako and Sekisui, respectively), and insulin and C-peptide concentrations were measured using an RIA kit.

Liver triglycerides were extracted using ~100 mg tissue. Tissues were homogenized in ice cold 2:1 chloroform:methanol, and lipids were extracted with shaking at room temperature for 3–4 h. Sulfuric acid was added to ~100 mM, and samples were vortexed

and then centrifuged to achieve phase separation. The organic phase was collected for analysis of triglyceride content (Sekisui Triglyceride-SL kit; Sekisui Diagnostics) and analysis of U<sup>13</sup>C palmitate enrichment.

**Hepatic Gene Expression.** Total RNA was extracted from ~20 mg liver, using the RNeasy mini kit (Qiagen). RNA was reverse-transcribed into cDNA with the use of the QuantiTect Reverse Transcription Kit (Qiagen). The abundance of transcripts was assessed by real-time PCR on an Applied Biosystems 7500 Fast Real-Time PCR System (Applied Biosystems) with a SYBR Green detection system (Stratagene). The expression data for each gene of interest were against  $\beta$ -actin as the invariant control, and relative expression was determined using amplification efficiencies (4). Primer sequences are available on request.

**Western Blotting.** Tissue (~100 mg) was homogenized in 1 mL ice-cold homogenization buffer (20 mM Tris-HCl, pH 7.4, 5 mM EDTA, 0.25 mM EGTA, 10 mM Na<sub>4</sub>P<sub>2</sub>O<sub>7</sub>, 1% Nonidet P-40, and protease and phosphatase inhibitor mixtures; Roche Diagnostics) and centrifuged at 6,000  $\times g$  at 4 °C for 15 min. The supernatant was taken, and protein concentration was determined by the Bradford method (Thermo Scientific). One hundred micrograms of protein was loaded and resolved by SDS/PAGE using a 4–12% (Novex by Life Technologies) gradient gel and electroblotted onto a polyvinylidene difluoride membrane (DuPont) using a wet-transfer cell. The membrane was then blocked for 60 min at room temperature in wash buffer containing 5% (wt/vol) nonfat dried milk and incubated overnight with primary antibody. After washing, membranes were incubated with horseradish peroxidase-conjugated secondary antibody (Cell Signaling Technology) for 60 min. Detection was performed with enhanced chemiluminescence.

Akt, phosphorylated Akt (Ser473), insulin receptor  $\beta$ , ACC, and phosphorylated ACC antibodies were purchased from Cell Signaling Technology.  $\beta$ -actin antibody was purchased from Sigma.

**Statistical Analysis.** Statistical analysis of the data was performed using GraphPad Prism 6. When two groups were compared, the Student unpaired  $t$  test was used. When three or more groups were compared, a one-way ANOVA analysis was used followed by Tukey's multiple comparison test. All data are expressed as mean  $\pm$  SEM unless otherwise indicated.  $P < 0.05$  was considered significant.

1. Diraison F, Pachioudi C, Beylot M (1996) In vivo measurement of plasma cholesterol and fatty acid synthesis with deuterated water: Determination of the average number of deuterium atoms incorporated. *Metabolism* 45(7):817–821.
2. Lee WN, et al. (1994) In vivo measurement of fatty acids and cholesterol synthesis using D<sub>2</sub>O and mass isotopomer analysis. *Am J Physiol* 266(5 Pt 1):E699–E708.

3. Wadke M, Brunengraber H, Lowenstein JM, Dolhun JJ, Arsenault GP (1973) Fatty acid synthesis by liver perfused with deuterated and tritiated water. *Biochemistry* 12(14):2619–2624.
4. Pfaffl MW (2001) A new mathematical model for relative quantification in real-time RT-PCR. *Nucleic Acids Res* 29(9):e45.
